# Supplementary material for: m6A Methyltransferase KIAA1429 Regulates the Cisplatin Sensitivity of Gastric Cancer Cells via Stabilizing FOXM1 mRNA
Source: MDPI journal article supplement (doi:10.3390/cancers14205025), 2022-10-14
Supplement: s1 [file s1]

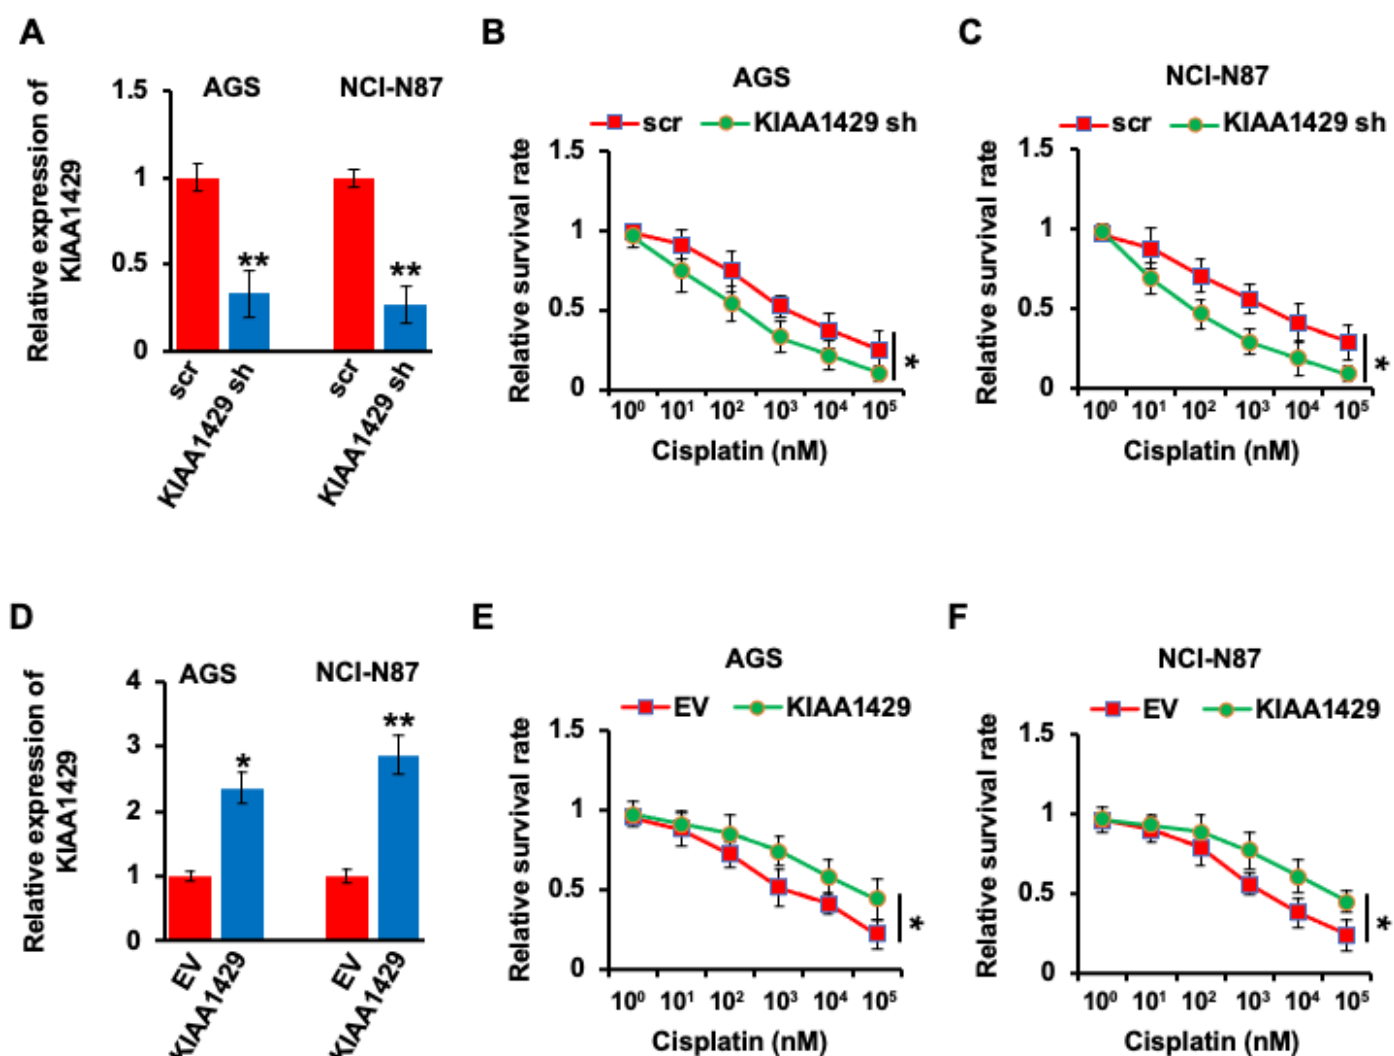

Figure S1. Effect of KIAA1429 depletion or overexpression on cisplatin response in wild type gastric cancer cells.

(A) AGS or NCI-N87 cells were infected with KIAA1429 shRNA, and the mRNA level of KIAA1429 was assessed by QRT-PCR. (B, C) Cisplatin IC<sub>50</sub> experiment was performed in AGS (B) or NCI-N87 (C) cells after infected with KIAA1429 shRNA. (D) AGS or NCI-N87 cells were transfected with KIAA1429 plasmid, and the mRNA level of KIAA1429 was assessed by QRT-PCR. (E, F) Cisplatin IC<sub>50</sub> experiment was performed in AGS (E) or NCI-N87 (F) cells after transfected with KIAA1429 plasmid. \*p<0.05, \*\*p<0.01.

Figure S2

Fig. 1D METTL3

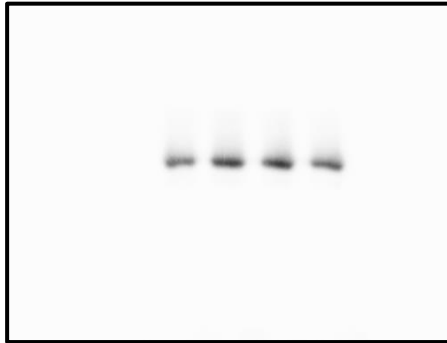

Fig. 1D METTL14

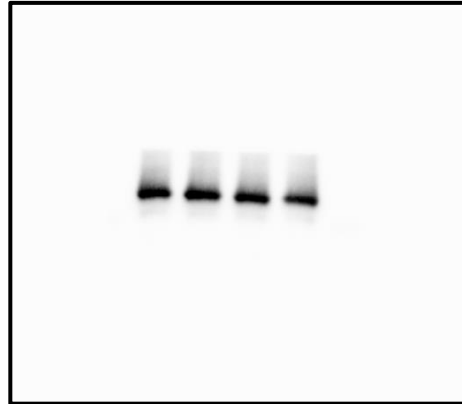

Fig. 1D WTAP

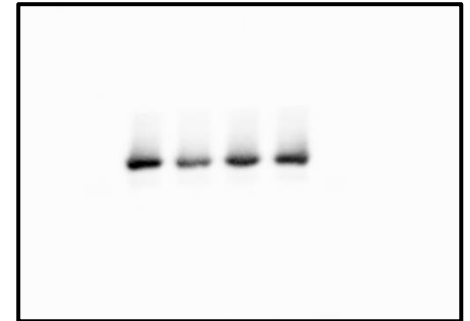

Fig. 1D KIAA1429

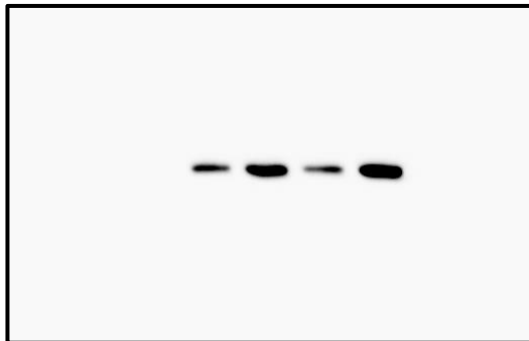

Fig. 1D GAPDH

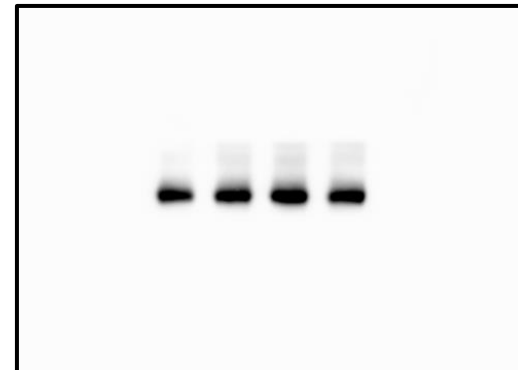

**The Western Blot figures in the Figure 1.**

Figure S3

Fig. 2A KIAA1429

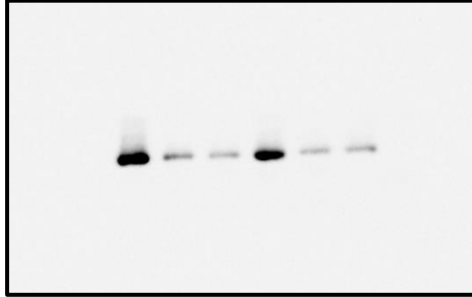

Fig. 2A GAPDH

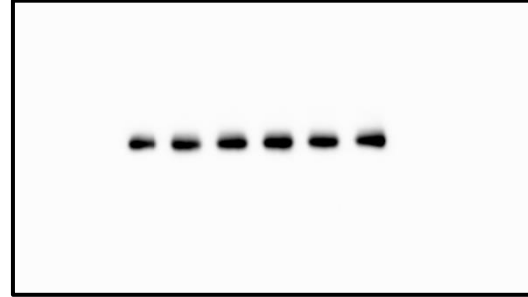

Fig. 2D KIAA1429

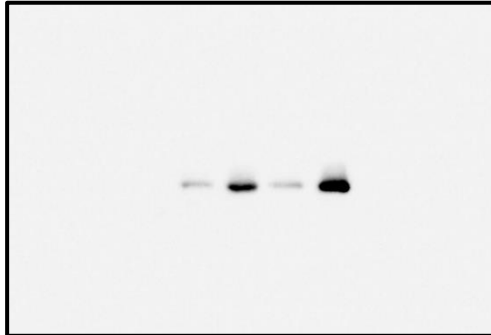

Fig. 2D GAPDH

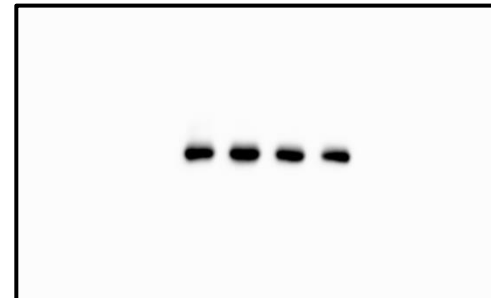

**The Western Blot figures in the Figure 2.**

**Figure S4**

**Fig. 3C p-p65**

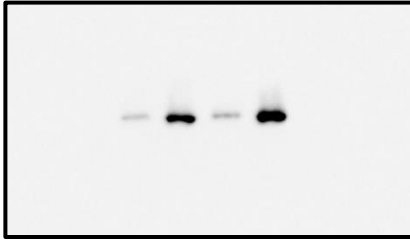

**Fig. 3C p65**

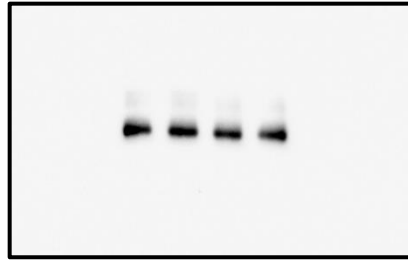

**Fig. 3C GAPDH**

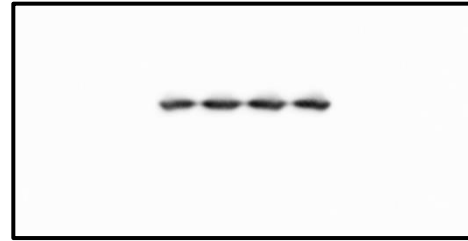

**Fig. 3E p65**

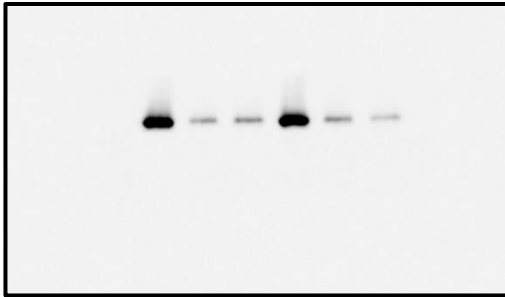

**Fig. 3E KIAA1429**

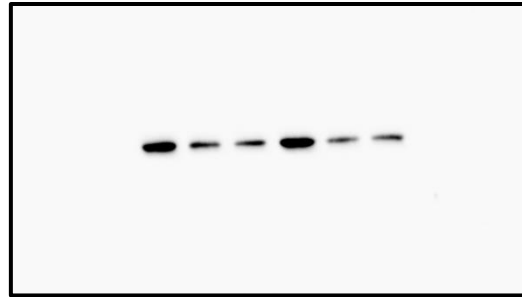

**Fig. 3E GAPDH**

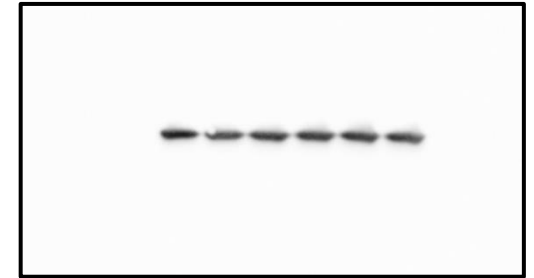

**Fig. 3F p65**

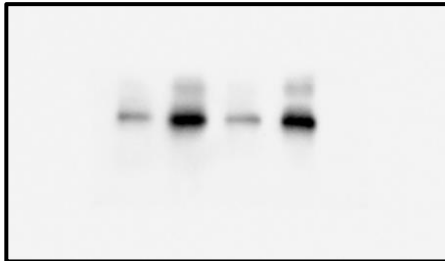

**Fig. 3F KIAA1429**

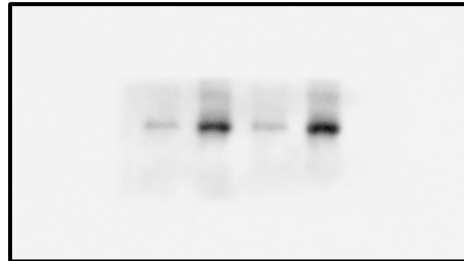

**Fig. 3F GAPDH**

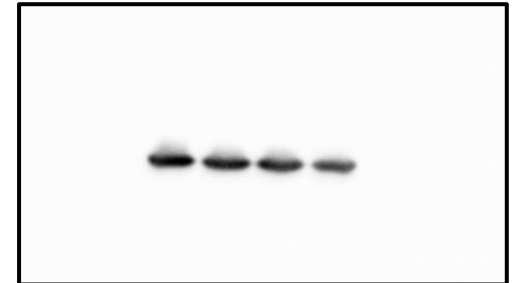

**The Western Blot figures in the Figure 3.**
